# Supplementary material for: Phylogeny and Taxonomic Synopsis of the Genus Bougainvillea (Nyctaginaceae)
Source: MDPI journal article supplement (doi:10.3390/plants11131700), 2022-06-27
Supplement: s1 [file s1]

**Figure S1.** Insertion-Deletions (InDels) in the protein-coding genes of *Bougainvillea* chloroplast genomes

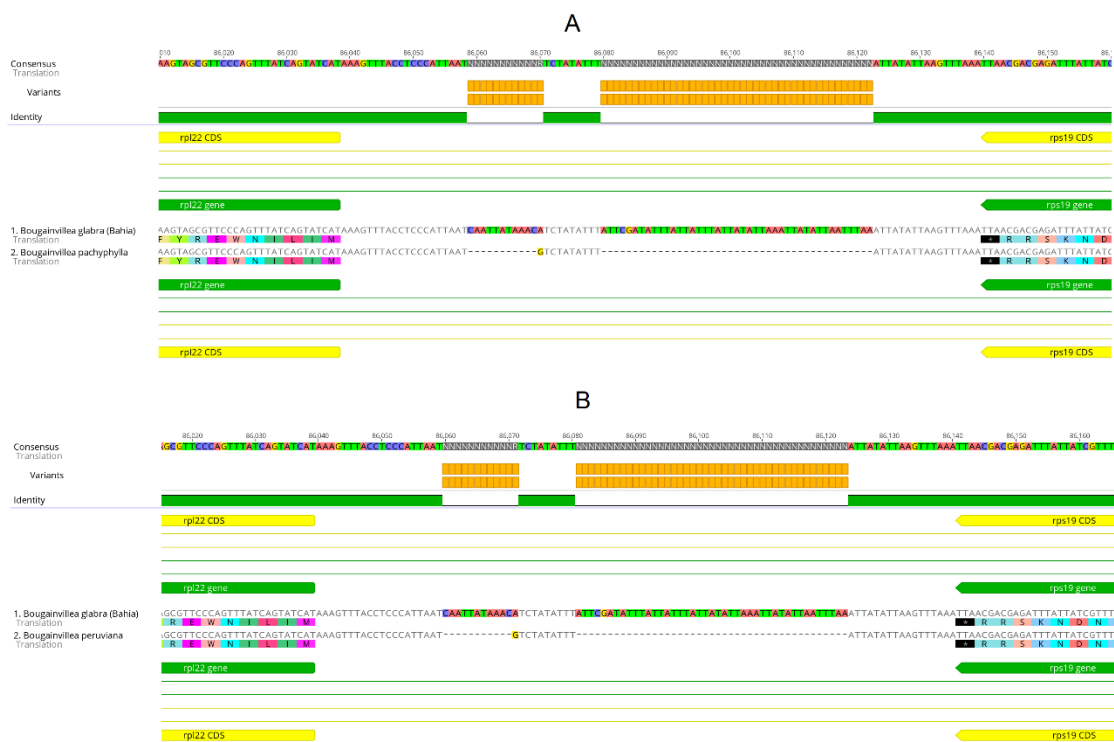

A large deletion in the *rpl22-rps19* intergenic spacer of (A) *B. pachyphylla* and (B) *B. peruviana*.

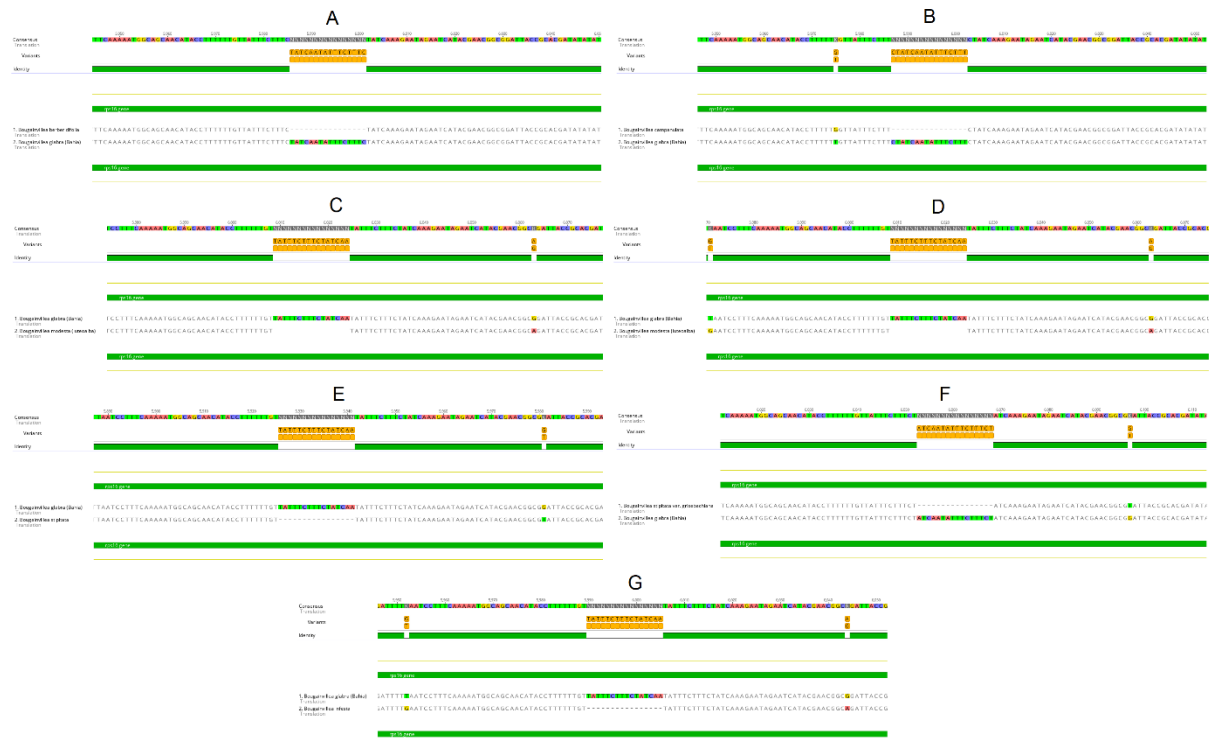

Deletion in the *rps16* intron of wild *Bougainvillea* species (A) *B. berberidifolia*, (B) *B. campanulata*, (C) *B. luteoalba*, (D) *B. modesta*, (E) *B. stipitata*, and (F) *B. stipitata* var. *grisebachiana*.

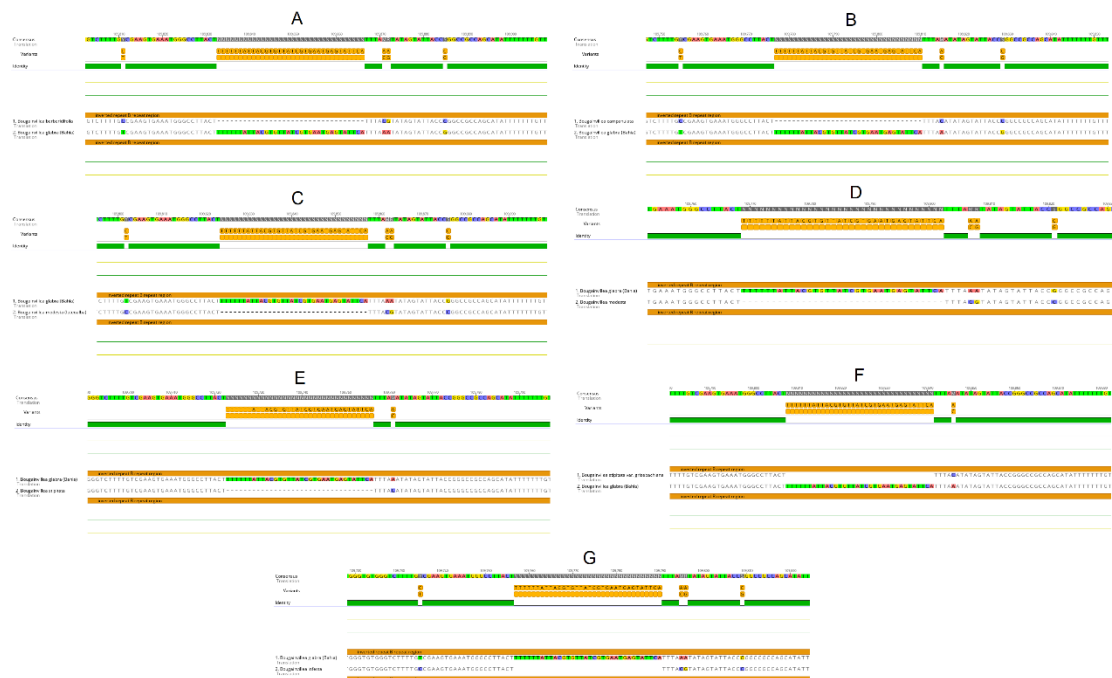

A large deletion in the *trnR*-*AGC*-*trnN*-*GUU* intergenic spacer of wild *Bougainvillea* species (A) *B. berberidifolia*, (B) *B. campanulata*, (C) *B. luteoalba*, (D) *B. modesta*, (E) *B. stipitata*, and (F) *B. stipitata* var. *grisebachiana*.

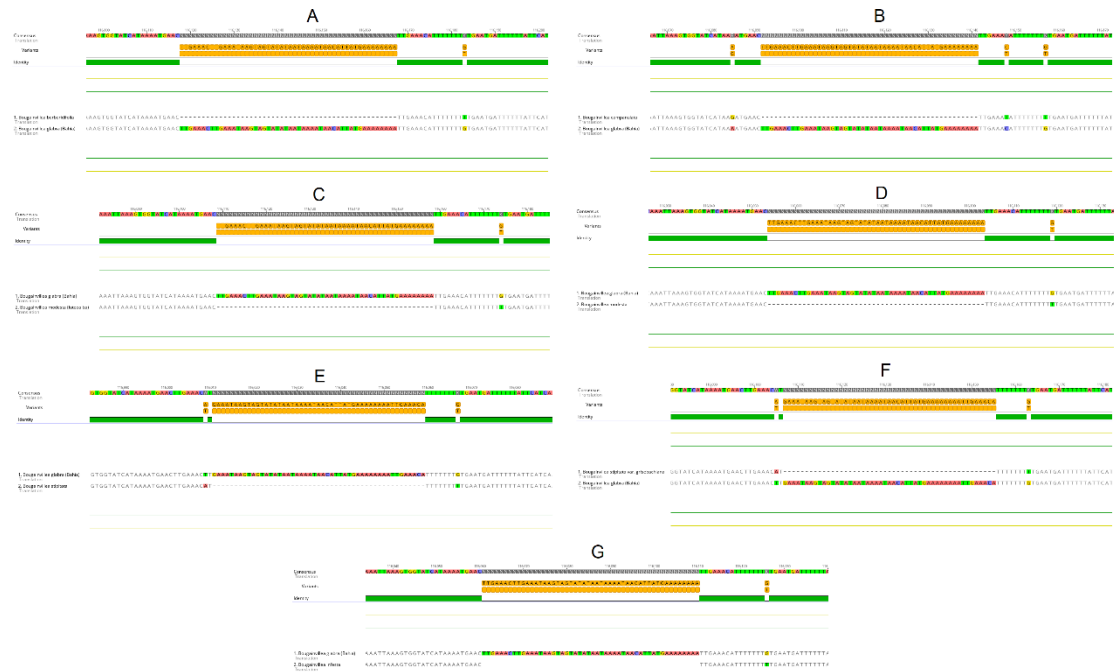

A large deletion in the *rpl32-trnL-UAG* intergenic spacer of wild *Bougainvillea* species (A) *B. berberidifolia*, (B) *B. campanulata*, (C) *B. luteoalba*, (D) *B. modesta*, (E) *B. stipitata*, and (F) *B. stipitata* var. *grisebachiana*.

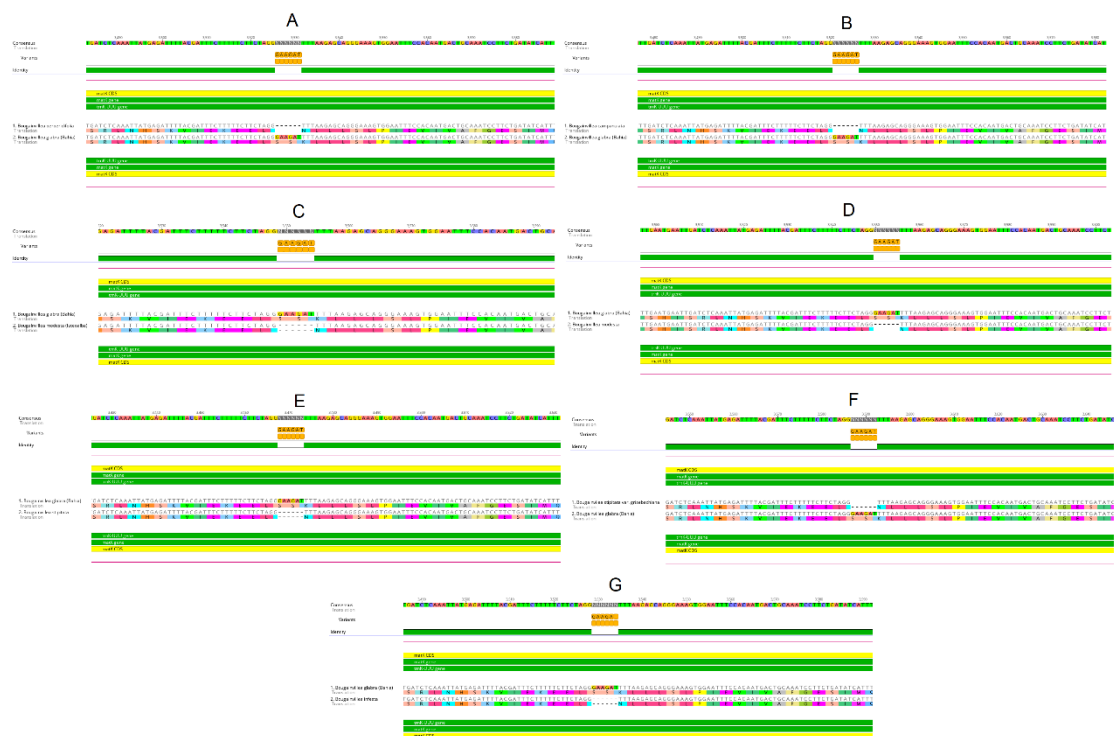

A small deletion in the *matK* gene of wild *Bougainvillea* species (A) *B. berberidifolia*, (B) *B. campanulata*, (C) *B. luteoalba*, (D) *B. modesta*, (E) *B. stipitata*, (F) *B. stipitata* var. *grisebachiana*.

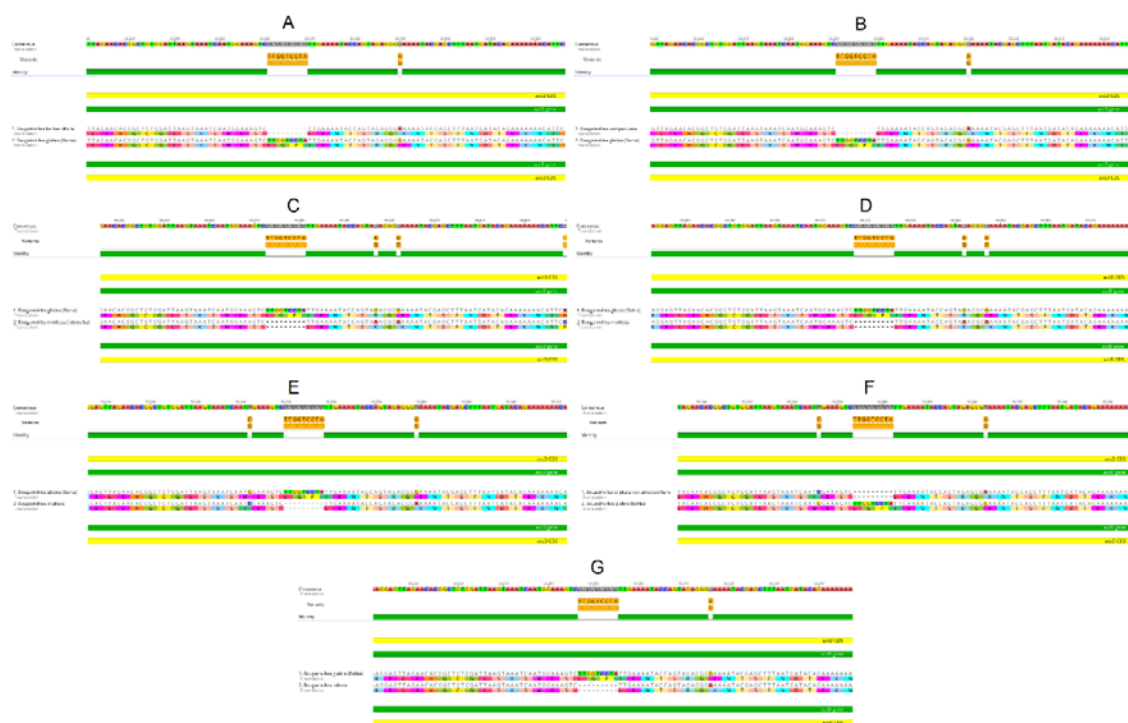

A small deletion (9 bp) in the *accD* gene of wild *Bougainvillea* species (A) *B. berberidifolia*, (B) *B. campanulata*, (C) *B. luteoalba*, (D) *B. modesta*, (E) *B. stipitata*, (F) *B. stipitata* var. *grisebachiana*.

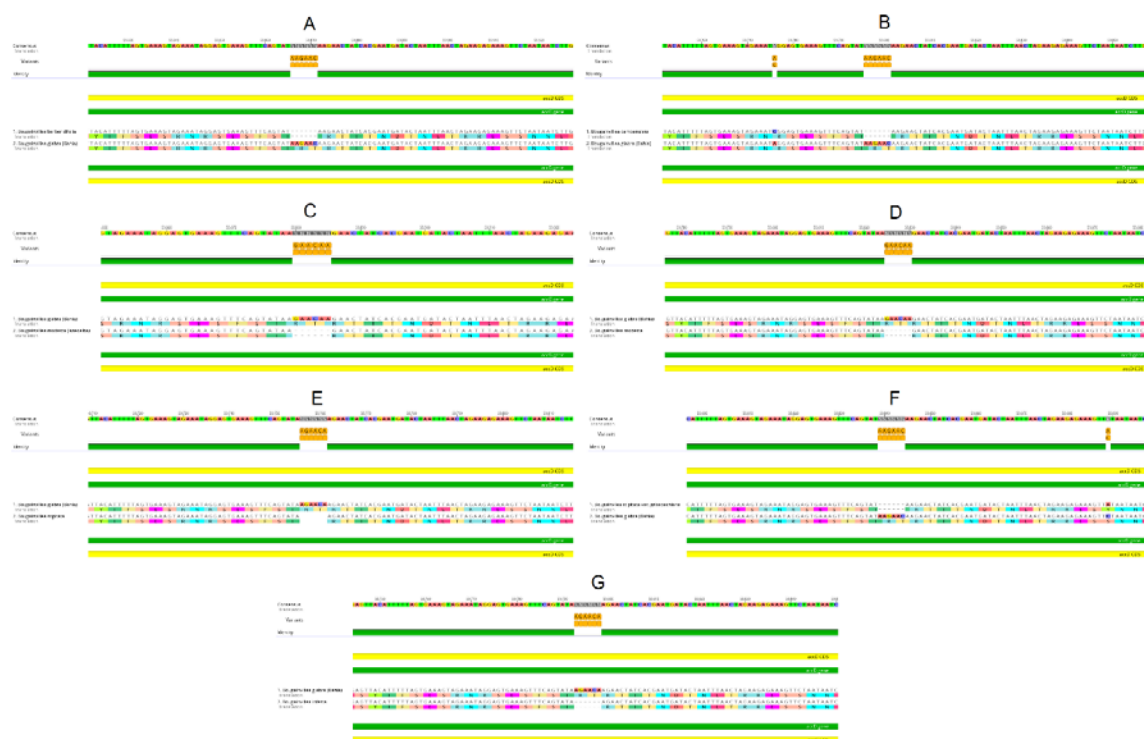

A small deletion (6 bp) in the *accD* gene of wild *Bougainvillea* species (A) *B. berberidifolia*, (B) *B. campanulata*, (C) *B. luteoalba*, (D) *B. modesta*, (E) *B. stipitata*, (F) *B. stipitata* var. *grisebachiana*.
