# Supplementary material for: Phylogeny and Taxonomic Synopsis of the Genus Bougainvillea (Nyctaginaceae)
Source: MDPI journal article supplement (doi:10.3390/plants11131700), 2022-06-27
Supplement: s1 [file s1]

**Table S2. List of genes encoded by *Bougainvillea* chloroplast genomes**

| Gene category                            | Gene names                                                                                                                                                                                                                                                                                                                                                                                                                                                                                                               |
|------------------------------------------|--------------------------------------------------------------------------------------------------------------------------------------------------------------------------------------------------------------------------------------------------------------------------------------------------------------------------------------------------------------------------------------------------------------------------------------------------------------------------------------------------------------------------|
| ATP Synthase                             | <i>atpA, atpB, atpE, atpF*</i> , <i>atpH, atpI</i>                                                                                                                                                                                                                                                                                                                                                                                                                                                                       |
| NADH dehydrogenase                       | <i>ndhA*</i> , <i>ndhB<sup>(X2)*</sup></i> , <i>ndhC, ndhD, ndhE, ndhF, ndhG, ndhH, ndhI, ndhJ, ndhK</i>                                                                                                                                                                                                                                                                                                                                                                                                                 |
| Cytochrome b/f complex                   | <i>petA, petB*</i> , <i>petD*</i> , <i>petG, petL, petN</i>                                                                                                                                                                                                                                                                                                                                                                                                                                                              |
| Photosystem I                            | <i>psaA, psaB, psaC, psaI, psaJ</i>                                                                                                                                                                                                                                                                                                                                                                                                                                                                                      |
| Photosystem II                           | <i>psbA, psbB, psbC, psbD, psbE, psbF, psbH, psbI, psbJ, psbK, psbL, psbM, psbN, psbT, psbZ</i>                                                                                                                                                                                                                                                                                                                                                                                                                          |
| RubisCO large subunit                    | <i>rbcL</i>                                                                                                                                                                                                                                                                                                                                                                                                                                                                                                              |
| Ribosomal protein genes (large subunits) | <i>rpl2<sup>(x2)*</sup></i> , <i>rpl14, rpl16*</i> , <i>rpl20, rpl22, rpl23<sup>(x2)</sup></i> , <i>rpl32, rpl33, rpl36</i>                                                                                                                                                                                                                                                                                                                                                                                              |
| Ribosomal protein genes (small subunits) | <i>rps2, rps3, rps4, rps7<sup>(x2)</sup></i> , <i>rps8, rps11, rps12<sup>(x2)#</sup></i> , <i>rps14, rps15, rps16*</i> , <i>rps18, rps19</i>                                                                                                                                                                                                                                                                                                                                                                             |
| RNA Polymerase                           | <i>rpoA, rpoB, rpoC1*</i> , <i>rpoC2</i>                                                                                                                                                                                                                                                                                                                                                                                                                                                                                 |
| Ribosomal RNA genes                      | <i>rrn4.5<sup>(X2)</sup></i> , <i>rrn5<sup>(X2)</sup></i> , <i>rrn16<sup>(X2)</sup></i> , <i>rrn23<sup>(X2)</sup></i>                                                                                                                                                                                                                                                                                                                                                                                                    |
| Transfer RNA genes                       | <i>trnI-CAU<sup>(x2)</sup></i> , <i>trnL-CAA<sup>(x2)</sup></i> , <i>trnV-GAC<sup>(x2)</sup></i> , <i>trnI-GAU<sup>(x2)*</sup></i> , <i>trnA-UGC<sup>(x2)*</sup></i> , <i>trnR-ACG<sup>(x2)</sup></i> , <i>trnN-GUU<sup>(x2)</sup></i> , <i>trnL-UAG, trnP-UGG, trnW-CCA, trnM-CAU, trnV-UAC*</i> , <i>trnF-GAA, trnL-UAA*</i> , <i>trnT-UGU, trnS-GGA, trnM-CAU, trnG-GCC, trnS-UGA, trnT-GGU, trnE-UUC, trnY-GUA, trnD-GUC, trnC-GCA, trnR-UCU, trnG-UCC*</i> , <i>trnS-GCU, trnQ-UUG, trnK-UUU*</i> , <i>trnH-GUG</i> |
| ATP-dependent protease                   | <i>clpP**</i>                                                                                                                                                                                                                                                                                                                                                                                                                                                                                                            |
| Maturase                                 | <i>matK</i>                                                                                                                                                                                                                                                                                                                                                                                                                                                                                                              |
| Hypothetical chloroplast reading frames  | <i>ycf1<sup>(x2)</sup></i> , <i>ycf2<sup>(x2)</sup></i> , <i>ycf3**</i> , <i>ycf4</i>                                                                                                                                                                                                                                                                                                                                                                                                                                    |
| Acetyl-CoA carboxylase                   | <i>accD</i>                                                                                                                                                                                                                                                                                                                                                                                                                                                                                                              |
| C-type cytochrome synthesis gene         | <i>ccsA</i>                                                                                                                                                                                                                                                                                                                                                                                                                                                                                                              |
| Envelope membrane protein                | <i>cemA</i>                                                                                                                                                                                                                                                                                                                                                                                                                                                                                                              |
| Translational initiation factor          | <i>infA</i>                                                                                                                                                                                                                                                                                                                                                                                                                                                                                                              |

\*genes with intron

#trans-spliced gene
