# Supplementary material for: Phylogeny and Taxonomic Synopsis of the Genus Bougainvillea (Nyctaginaceae)
Source: MDPI journal article supplement (doi:10.3390/plants11131700), 2022-06-27
Supplement: s1 [file s1]

**Table S5.** Morphological comparison of *Bougainvillea* species

| <b>Taxa</b>                                                   | <b>Habit</b>                  | <b>Branches</b>                 | <b>Thorn</b>                        | <b>Leaves</b>                                                                                                                              | <b>Bracts</b>                                                                                                         | <b>Perianth</b>                                                                                   | <b>Anthocarp</b>                       | <b>Ovary</b>          | <b>Stamens</b> |
|---------------------------------------------------------------|-------------------------------|---------------------------------|-------------------------------------|--------------------------------------------------------------------------------------------------------------------------------------------|-----------------------------------------------------------------------------------------------------------------------|---------------------------------------------------------------------------------------------------|----------------------------------------|-----------------------|----------------|
| <i><b>Bougainvillea peruviana</b></i><br>Humb. & Bonpl.       | shrubs but sometimes scandent | sparsely puberulent or glabrate | simple, slender thorns, 1-2 cm long | alternate, glabrous, broadly ovate to suborbicular, 4-7 cm long                                                                            | bright rose or peach, glabrous except for puberulent costa, 1.5-4 cm long, apex obtuse to rounded                     | glabrous, 15-18 mm long, perianth tube almost linear-oblong or slightly constricted, very slender | oblong-linear, glabrous, 10-20 mm long | oblong, ca. 4 mm long | 6-7            |
| <i><b>Bougainvillea pachyphylla</b></i><br>Heimerl ex Standl. | shrubs or small trees         | finely puberulent when young    | simple                              | alternate, thick, and somewhat leathery, finely, or densely puberulent, ovate, 3-6 cm long                                                 | Rose colored or light crimson, glabrate, broadly elliptic-ovate, apex obtuse                                          | densely puberulent, 9-11 mm long                                                                  | unknown                                |                       |                |
| <i><b>Bougainvillea spinosa</b></i> (Cav.)<br>Heimerl         | shrubs                        | sparsely puberulent when young  | furcate or forked, 2-3 cm long      | arranged in fascicles or brachyblasts, thick and fleshy, glabrous, narrowly spatulate, linear-spatulate or oblong-spatulate, 9-15 × 2-3 mm | yellowish white or pinkish, sparsely puberulent or glabrous, ovate-cordate to orbicular, about 12 mm long, membranous | glabrous or sparsely puberulent, reddish, 8-15 mm long, ovoid at the perianth base                | anthocarp ovoid, 6-7 mm long           | ovoid, ca. 4 mm long  | 5-8            |

|                                                    |                          |                                                                           |                                                                  |                                                                                                                                                                                                                        |                                                                                                                                                       |                                                                                                              |         |                             |           |
|----------------------------------------------------|--------------------------|---------------------------------------------------------------------------|------------------------------------------------------------------|------------------------------------------------------------------------------------------------------------------------------------------------------------------------------------------------------------------------|-------------------------------------------------------------------------------------------------------------------------------------------------------|--------------------------------------------------------------------------------------------------------------|---------|-----------------------------|-----------|
| <i>Bougainvillea<br/>berberidifolia</i><br>Heimerl | shrubs                   | glabrate<br>but<br>sparsely<br>tomentulose when<br>young                  | simple<br>thorns,<br>around 1-<br>2 cm long                      | arranged in<br>brachyblasts,<br>lamina not fleshy,<br>glabrate, elliptic-<br>obovate, broadest<br>in middle or<br>slightly above, 1-<br>2 cm long                                                                      | pinkish but<br>greenish white<br>when dried,<br>glabrous except<br>for costa, 25-27<br>mm long, ovate,<br>apex subobtuse or<br>rounded,<br>membranous | glabrous, reddish,<br>perianth tube<br>narrow, 11-14<br>mm long, ca. 1.5<br>mm wide, slightly<br>constricted | unknown | oblong,<br>3.5-4 mm<br>long | usually 5 |
| <i>Bougainvillea<br/>campanulata</i><br>Heimerl    | shrubs or<br>trees       | glabrous<br>but<br>slightly<br>tomentulose when<br>young                  | unarmed<br>or armed<br>with 2-3<br>cm simple<br>thorns           | alternate or in<br>brachyblasts,<br>glabrous but<br>sometimes<br>minutely<br>hirtellous<br>abaxially, elliptic-<br>lanceolate to<br>elliptic-oblong,<br>broadest at or<br>slightly below<br>middle, 2.5 × 0.5-<br>2 cm | yellowish green or<br>white, glabrous or<br>sparsely<br>puberulent, ovate<br>to elliptic-ovate,<br>8-20 mm long, 4-<br>12 mm wide, apex<br>obtuse     | glabrous or<br>hirtellous apically,<br>greenish yellow,<br>6-7 mm long,<br>perianth tube<br>campanulate      | obovoid | obovoid,<br>ca, 2 mm        | 7-8       |
| <i>Bougainvillea<br/>infesta</i> Griseb.           | shrubs or<br>small trees | densely<br>pubescent<br>but turns<br>into<br>glabrate<br>upon<br>maturity | unarmed<br>or armed<br>with<br>simple<br>thorns, 1-<br>4 cm long | arranged in<br>fascicles or<br>brachyblasts,<br>pubescent to<br>densely<br>puberulent or<br>tomentulose<br>abaxially, elliptic-<br>lanceolate or<br>elliptic-ovate,<br>broadest at or<br>below middle, 2-4<br>× 1-3 cm | greenish, densely<br>pubescent,<br>oblong-elliptic,<br>20-35 mm long,<br>11-16 mm wide,<br>apex rounded or<br>obtuse,<br>membranous                   | densely pubescent<br>or hirsute,<br>greenish, 12-20<br>mm long, perianth<br>tube fusiform at<br>base         | unknown | ovary<br>navicular          | 5-6       |

|                                        |                 |                                                                                              |                                                               |                                                                                                                       |                                                                                                                                                                  |                                                                                                                                                               |                                                                         |                                    |           |
|----------------------------------------|-----------------|----------------------------------------------------------------------------------------------|---------------------------------------------------------------|-----------------------------------------------------------------------------------------------------------------------|------------------------------------------------------------------------------------------------------------------------------------------------------------------|---------------------------------------------------------------------------------------------------------------------------------------------------------------|-------------------------------------------------------------------------|------------------------------------|-----------|
| <i>Bougainvillea modesta</i> Heimerl   | Shrubs or trees | partially elongated, spreading obliquely, young parts tomentulose but glabrate upon maturity | unarmed                                                       | alternate, tomentose, elliptic to ovate-elliptic, 5-8 × 3-4 cm                                                        | pale yellow to whitish yellow, thin, moderately to densely puberulous on both surfaces, elliptic to elliptic-ovate, 15-17 mm long, acute at the apex, membranous | densely tomentulose, broad, yellowish brown perianth lobes, greenish-brown perianth tube, 2.5 mm wide, 10-11 mm long, almost straight or slightly constricted | ovoid to ellipsoid                                                      | oblong-ellipsoid                   | usually 6 |
| <i>Bougainvillea stipitata</i> Griseb. | Shrubs or trees | young branches puberulent or tomentulose                                                     | unarmed or armed with simple thorns, 2-2.5 cm long            | alternate, puberulent or glabrous, ovate, rhombic or ovate-lanceolate, 3.5-7 × 2-4 cm                                 | greenish or pinkish purplish, sparsely or densely puberulent, broadly ovate or elliptic-ovate, 14-20 x 10-15 mm, apex acute or obtuse, papyraceous               | puberulent, green or greenish yellow, 11-25 mm, perianth tube very constricted in the middle, spindle-shaped at the base                                      | spindle-shaped/fusiform, 12-15 mm long, minutely puberulent or glabrous | spindle-shaped/fusiform, 3 mm long | 7-8       |
| <i>Bougainvillea praecox</i> Griseb.   | shrubs or trees | tomentulose but glabrate upon maturity                                                       | unarmed or sparsely armed with simple thorns, about 5 mm long | alternate, appressed tomentose abaxially but becoming glabrate, ovate to elliptic or ovate-elliptic, ca. 5-9 × 4-7 cm | white but greenish upon drying, densely puberulent, particularly on the costa and veins, broadly ovate, about 14 mm long, apex rounded, or obtuse                | densely tomentulose, 9-11 mm long, oblong-ellipsoid or subfusiform at perianth base                                                                           | ellipsoid or subfusiform                                                | narrowly obconical, 3.5-4.5 × 1 mm | 5-6       |

|                                                |                                |                                                                |                                                          |                                                                                                           |                                                                                                                                          |                                                                                                                                                     |                                                   |                                                 |     |
|------------------------------------------------|--------------------------------|----------------------------------------------------------------|----------------------------------------------------------|-----------------------------------------------------------------------------------------------------------|------------------------------------------------------------------------------------------------------------------------------------------|-----------------------------------------------------------------------------------------------------------------------------------------------------|---------------------------------------------------|-------------------------------------------------|-----|
| <b><i>Bougainvillea spectabilis</i></b> Willd. | scandent shrubs or woody vines | fulvous-villous, rarely glabrate                               | armed with numerous simple stout thorns, about 4 mm long | alternate, densely villous abaxially, ovate to suborbicular, 5-10 × 2-6 cm                                | purplish red, sparsely puberulent or short villous, ovate or oval, 2-4.5 cm long, abruptly acute at the apex                             | short villous, 15-30 mm, perianth lobes yellowish, perianth tube greenish, ellipsoid at the base                                                    | ellipsoid or oblong, 11-14 mm, short villous      | ellipsoid or oblong                             | 7-8 |
| <b><i>Bougainvillea glabra</i></b> Choisy      | scandent shrubs or woody vines | young branches pubescent but turns into glabrate upon maturity | armed with numerous simple, stout thorns                 | alternate, glabrate but very young leaves puberulent, ovate to ovate-lanceolate or elliptic, 4-10 cm long | purple to purplish-red, sparsely puberulent or glabrous, broadly ovate to oval, 1.5-4.5 cm long, acute or abruptly acuminate at the apex | sparsely to densely puberulent, 15-25 mm long, perianth lobes yellowish white, perianth tube greenish, oblong at the base                           | oblong, 8-15 mm long                              | oblong                                          | 7-8 |
| <b><i>Bougainvillea arborea</i></b> Glaz.      | Trees                          | young branches pubescent but glabrate upon maturity            | unarmed or sparsely armed with simple thorns             | alternate, puberulent but becoming glabrate as they mature, elliptic-lanceolate, 5-12 cm long             | purple-pinkish, puberulent or densely puberulent, broadly ovate or elliptic, 2-4.5 cm long, apex acute or acuminate                      | sparsely to densely puberulent, 15-20 mm long, perianth lobes greenish yellow, perianth tube greenish, obconical to obturbinoid or fusiform at base | obconical, obturbinoid or fusiform, 8-10 mm long. | ovary fusiform or obturbino id, ca. 4-5 mm long | 7-8 |
