# Supplementary material for: Phylogeny and Taxonomic Synopsis of the Genus Bougainvillea (Nyctaginaceae)
Source: MDPI journal article supplement (doi:10.3390/plants11131700), 2022-06-27
Supplement: s1 [file s1]

**Table S1. Genome features of *Bougainvillea* chloroplast genomes.**

| Species / cultivar                            | Genome size (bp) | LSC (bp) | SSC (bp) | IRs (bp) | Number of Genes |     |      |      | GC Content (%) |      |      |      |
|-----------------------------------------------|------------------|----------|----------|----------|-----------------|-----|------|------|----------------|------|------|------|
|                                               |                  |          |          |          | Total           | CDS | tRNA | rRNA | Total          | LSC  | SSC  | IRs  |
| <i>B. glabra</i>                              | 154,536          | 85,708   | 18,038   | 25,395   | 131             | 86  | 37   | 8    | 36.5           | 34.2 | 29.5 | 42.8 |
| <i>B. peruviana</i>                           | 153,966          | 85,159   | 18,025   | 25,391   | 131             | 86  | 37   | 8    | 36.6           | 34.3 | 29.6 | 42.8 |
| <i>B. pachyphylla</i>                         | 154,062          | 85,181   | 18,027   | 25,427   | 131             | 86  | 37   | 8    | 36.5           | 34.3 | 29.6 | 42.8 |
| <i>B. praecox</i>                             | 154,306          | 85,474   | 18,014   | 25,409   | 131             | 86  | 37   | 8    | 36.5           | 34.3 | 29.5 | 42.8 |
| <i>B. cultivar</i>                            | 154,520          | 85,688   | 18,078   | 25,377   | 131             | 86  | 37   | 8    | 36.5           | 34.2 | 29.5 | 42.8 |
| <i>B. spectabilis</i>                         | 154,541          | 85,694   | 18,077   | 25,385   | 131             | 86  | 37   | 8    | 36.4           | 34.2 | 29.5 | 42.7 |
| <i>B. arborea</i>                             | 154,828          | 85,958   | 18,028   | 25,421   | 131             | 86  | 37   | 8    | 36.4           | 34.1 | 29.5 | 42.8 |
| <i>B. berberidifolia</i>                      | 154,561          | 85,789   | 18,000   | 25,386   | 131             | 86  | 37   | 8    | 36.5           | 34.2 | 29.4 | 42.8 |
| <i>B. campanulata</i>                         | 154,529          | 85,700   | 18,059   | 25,385   | 131             | 86  | 37   | 8    | 36.5           | 34.2 | 29.4 | 42.8 |
| <i>B. infesta</i>                             | 154,385          | 85,596   | 18,017   | 25,386   | 131             | 86  | 37   | 8    | 36.5           | 34.3 | 29.4 | 42.8 |
| <i>B. modesta</i>                             | 154,387          | 85,618   | 17,997   | 25,386   | 131             | 86  | 37   | 8    | 36.5           | 34.3 | 29.5 | 42.8 |
| <i>B. luteoalba</i>                           | 154,457          | 85,687   | 17,998   | 25,386   | 131             | 86  | 37   | 8    | 36.5           | 34.2 | 29.5 | 42.8 |
| <i>B. spinosa</i>                             | 154,872          | 85,846   | 18,020   | 25,503   | 131             | 86  | 37   | 8    | 36.4           | 34.1 | 29.4 | 42.8 |
| <i>B. stipitata</i>                           | 154,667          | 85,861   | 18,036   | 25,385   | 131             | 86  | 37   | 8    | 36.5           | 34.2 | 29.4 | 42.9 |
| <i>B. stipitata</i> var. <i>grisebachiana</i> | 154,679          | 85,894   | 18,015   | 25,385   | 131             | 86  | 37   | 8    | 36.5           | 34.2 | 29.4 | 42.8 |
