# Supplementary material for: Phylogeny and Taxonomic Synopsis of the Genus Bougainvillea (Nyctaginaceae)
Source: MDPI journal article supplement (doi:10.3390/plants11131700), 2022-06-27
Supplement: s1 [file s1]

**Table S4.** Data set included in the phylogenetic and comparative analyses of complete chloroplast DNA sequences (*Bougainvillea*, Nyctaginaceae)

|                       | Family        | Species                                                  | Accession Numbers |
|-----------------------|---------------|----------------------------------------------------------|-------------------|
| <b>Caryophyllales</b> | Petiveriaceae | <i>Seguieria aculeata</i>                                | NC_041418         |
|                       | (outgroup)    | <i>Rivina humilis</i>                                    | NC_041300         |
|                       |               | <i>Monococcus echinophorus</i>                           | NC_041414         |
|                       |               | <i>Petiveria alliacea</i>                                | NC_041417         |
| <b>Caryophyllales</b> | Nyctaginaceae | <i>Salpianthus macrodontus</i>                           | MH286311          |
|                       |               | <i>Guapira discolor</i>                                  | MH286310          |
|                       |               | <i>Pisonia aculeata</i>                                  | MK397886          |
|                       |               | <i>Ascleisanthos obtusa</i>                              | MH286321          |
|                       |               | <i>Nyctaginia capitata</i>                               | MH286318          |
|                       |               | <i>Mirabilis jalapa</i>                                  | NC_041297         |
|                       |               | <i>Bougainvillea spectabilis</i>                         | MK397858          |
|                       |               | <i>Bougainvillea spectabilis</i>                         | MN315508          |
|                       |               | <i>Bougainvillea glabra</i>                              | MN449976          |
|                       |               | <i>Bougainvillea stipitata</i> var. <i>grisebachiana</i> | OM044392          |
|                       |               | <i>Bougainvillea arborea</i>                             | OM044393          |
|                       |               | <i>Bougainvillea luteoalba</i>                           | OM044394          |
|                       |               | <i>Bougainvillea berberidifolia</i>                      | OM044395          |
|                       |               | <i>Bougainvillea stipitata</i>                           | OM044396          |
|                       |               | <i>Bougainvillea spinosa</i>                             | OM044397          |
|                       |               | <i>Bougainvillea modesta</i>                             | OM044398          |
|                       |               | <i>Bougainvillea infesta</i>                             | OM044399          |
|                       |               | <i>Bougainvillea campanulata</i>                         | OM044400          |

|                                     |          |
|-------------------------------------|----------|
| <i>Bougainvillea glabra</i> (Bahia) | MW123899 |
| <i>Bougainvillea praecox</i>        | MW123900 |
| <i>Bougainvillea peruviana</i>      | MW123901 |
| <i>Bougainvillea pachyphylla</i>    | MW123902 |
| <i>Bougainvillea</i> cultivar       | MW123903 |

---
