# Supplementary material for: Phylogeny and Taxonomic Synopsis of the Genus Bougainvillea (Nyctaginaceae)
Source: MDPI journal article supplement (doi:10.3390/plants11131700), 2022-06-27
Supplement: s1 [file s1]

**Table S3.** *Bougainvillea* samples included in the study

| Sample name                                            | Voucher                         | Place of Collection                                          |
|--------------------------------------------------------|---------------------------------|--------------------------------------------------------------|
| <i>Bougainvillea arborea</i> Glaz.                     | Chen T. 2020031202, SZG         | Shenzhen Fairy Lake Botanical Garden (originally from Miami) |
| <i>Bougainvillea berberidifolia</i> Heimerl.           | Chen T. 20110122A, USZ          | Saipina, Bolivia                                             |
| <i>Bougainvillea campanulata</i> Heimerl.              | Chen T. 20110122B, USZ          | Saipina, Bolivia                                             |
| <i>Bougainvillea</i> cultivar                          | Chen T. 2020031204 SZG          | Shenzhen Fairy Lake Botanical Garden (originally from India) |
| <i>Bougainvillea infesta</i> Griseb.                   | Fortunato R. M. et al. 7286, MO | Santa Bárbara, Jujuy, Argentina                              |
| <i>Bougainvillea luteoalba</i> Heimerl ex E. Valenz.   | Beck S.G. 5976, MO              | Beni, Bolivia                                                |
| <i>Bougainvillea modesta</i> Heimerl.                  | Chen T. 2011012101C, USZ        | El Torno, Bolivia                                            |
| <i>Bougainvillea glabra</i> Choisy                     | M.B.M. da Cruz 0001, NY         | Ilhéus, Bahia, Brazil                                        |
| <i>Bougainvillea pachyphylla</i> Heimerl ex Standl.    | Sagastegui A. et al. 15924, MO  | Chota, Cajamarca, Peru                                       |
| <i>Bougainvillea praecox</i> Griseb.                   | Chen T. 2012063001, SZG         | Jardim Botânico Plantarum, Nova Odes, Brazil                 |
| <i>Bougainvillea peruviana</i> Humb. & Bonpl.          | Chen T. et al. 2014052606, SZG  | on the way from Loja to Macara, Ecuador                      |
| <i>Bougainvillea spinosa</i> (Cav.) Heimerl.           | 1692, SI                        | Argentina                                                    |
| <i>Bougainvillea stipitata</i> Griseb.                 | Chen T. 2011012102, USZ         | Samaipata, Bolivia                                           |
| <i>B. stipitata</i> var. <i>grisebachiana</i> Heimerl. | Chen T. 2015061601, SZG         | Kew, Richmond, UK (originally from Argentina)                |
